# Supplementary material
Source: HighWire-hosted journal article supplement (http://www.ajnr.org/highwire/filestream/75526/field_highwire_adjunct_files/0/19-01200.pdf)
Supplement: 19-01200.pdf [file 19-01200.pdf]

**On-line Table: Evaluation of MR imaging findings compared with audiometric testing results ( $\kappa = 0.95, 0.94, 0.93, 0.90, 0.96,$  and  $0.96,$  respectively)**

|                               | First Reader%<br>(Confidence Interval%) | Second Reader%<br>(Confidence Interval%) | Consensus%<br>(Confidence Interval%) |
|-------------------------------|-----------------------------------------|------------------------------------------|--------------------------------------|
| Inner ear enhancement on T1+C |                                         |                                          |                                      |
| Sensitivity                   | 56.1 (42.4–69.3)                        | 59.7 (45.8–72.4)                         | 61.4 (47.6–74.0)                     |
| Specificity                   | 94.2 (89.3–97.3)                        | 95.5 (90.9–98.2)                         | 95.5 (90.9–98.2)                     |
| Positive predictive value     | 78.1 (64.4–87.5)                        | 82.9 (69.6–91.2)                         | 83.3 (70.2–91.4)                     |
| Negative predictive value     | 85.4 (81.3–88.7)                        | 86.6 (82.4–89.8)                         | 87.1 (82.9–90.3)                     |
| Diagnostic accuracy           | 84.0 (78.3–88.6)                        | 85.9 (80.4–90.2)                         | 86.3 (80.9–90.6)                     |
| Side of enhancement on T1+C   |                                         |                                          |                                      |
| Sensitivity                   | 49.1 (35.6–62.7)                        | 54.4 (40.7–67.6)                         | 56.1 (42.4–69.3)                     |
| Specificity                   | 95.5 (90.9–98.2)                        | 95.5 (90.9–98.2)                         | 95.5 (90.9–98.2)                     |
| Positive predictive value     | 80.0 (64.9–89.6)                        | 81.6 (67.4–90.5)                         | 82.1 (68.1–90.7)                     |
| Negative predictive value     | 83.6 (79.8–86.8)                        | 85.1 (81.1–88.3)                         | 85.6 (81.5–88.8)                     |
| Diagnostic accuracy           | 83.0 (77.3–87.8)                        | 84.4 (78.8–89.0)                         | 84.9 (79.4–89.4)                     |
| FLAIR hyperintensity          |                                         |                                          |                                      |
| Sensitivity                   | 39.4 (27.6–52.2)                        | 46.9 (34.6–59.7)                         | 50.0 (37.4–62.6)                     |
| Specificity                   | 95.9 (91.8–98.4)                        | 93.1 (88.2–96.4)                         | 93.6 (88.9–96.8)                     |
| Positive predictive value     | 78.8 (62.9–89.1)                        | 72.1 (58.6–82.5)                         | 75.0 (61.7–84.8)                     |
| Negative predictive value     | 80.6 (77.3–83.5)                        | 82.1 (78.5–85.3)                         | 83.1 (79.4–86.2)                     |
| Diagnostic accuracy           | 80.3 (74.7–85.2)                        | 80.3 (74.7–85.2)                         | 81.6 (76.1–86.3)                     |
| Side of FLAIR hyperintensity  |                                         |                                          |                                      |
| Sensitivity                   | 28.8 (18.3–41.2)                        | 40.9 (28.9–53.7)                         | 39.4 (27.6–52.2)                     |
| Specificity                   | 95.9 (91.8–98.4)                        | 93.1 (88.2–96.4)                         | 93.6 (88.9–96.8)                     |
| Positive predictive value     | 73.1 (54.5–86.0)                        | 69.2 (54.8–80.7)                         | 70.3 (55.4–81.8)                     |
| Negative predictive value     | 77.9 (75.1–80.5)                        | 80.5 (77.1–83.5)                         | 80.2 (76.9–83.2)                     |
| Diagnostic accuracy           | 77.4 (71.6–82.5)                        | 78.7 (72.9–83.7)                         | 78.7 (72.9–83.7)                     |
| Combined evaluation           |                                         |                                          |                                      |
| Sensitivity                   | 57.9 (44.1–70.9)                        | 61.4 (47.6–74.0)                         | 61.4 (47.6–74.0)                     |
| Specificity                   | 93.6 (88.5–96.9)                        | 95.5 (90.9–98.2)                         | 94.2 (89.3–97.3)                     |
| Positive predictive value     | 76.7 (63.5–86.2)                        | 83.3 (70.2–91.4)                         | 79.6 (66.6–88.3)                     |
| Negative predictive value     | 85.8 (81.6–89.2)                        | 87.1 (82.9–90.3)                         | 86.9 (82.7–90.2)                     |
| Diagnostic accuracy           | 84.0 (78.3–88.6)                        | 86.3 (80.9–90.6)                         | 85.4 (79.9–89.8)                     |
| Side of combined evaluation   |                                         |                                          |                                      |
| Sensitivity                   | 50.9 (37.3–64.4)                        | 57.9 (44.1–70.9)                         | 56.1 (42.4–69.3)                     |
| Specificity                   | 94.8 (90.1–97.8)                        | 95.5 (90.9–98.2)                         | 94.2 (89.3–97.3)                     |
| Positive predictive value     | 78.4 (63.8–88.2)                        | 82.5 (68.9–91.0)                         | 78.1 (64.4–88.7)                     |
| Negative predictive value     | 84.0 (80.1–87.3)                        | 86.1 (82.0–89.3)                         | 85.4 (81.3–88.7)                     |
| Diagnostic accuracy           | 83.0 (77.3–87.8)                        | 85.4 (79.9–89.8)                         | 84.0 (78.3–88.6)                     |
